# Supplementary material for: Binder-free cathodes based on sulfur–carbon nanofibers composites for lithium–sulfur batteries
Source: Royal Society of Chemistry journal article supplement (doi:10.1039/c4ra02122c), 2014-01-01
Supplement: c4ra02122c1.pdf [file c4ra02122c1.pdf]

## Electronic Supplementary Information

### Binder-free cathodes based on sulfur-carbon nanofibers composites for lithium-sulfur batteries

Songtao Lu <sup>a</sup>, Yan Chen <sup>a</sup>, Xiaohong Wu <sup>\*a</sup>, Zhida Wang <sup>a</sup>, Lingyuan Lv <sup>a</sup>, Wei Qin <sup>\*b</sup>  
and Lixiang Jiang <sup>c</sup>

<sup>a</sup> Department of Chemistry, Harbin Institute of Technology, Harbin, 150001, PR China

<sup>b</sup> School of Materials Science and Engineering, Harbin Institute of Technology, Harbin, 150001, PR China

<sup>c</sup> Science and Technology on Reliability and Environmental Engineering Laboratory, Beijing Institute of Satellite Environment Engineering, Beijing, 100094, PR China

#### 1. Experimental

##### 1.1 Synthesis of FCNFs

FCNFs were prepared by heating 100mg CNFs (80-100 nm) in 100mL 8M HNO<sub>3</sub> solution at 95°C under constant stirring for 12 hours. Then, they were rinsed in distilled water until the filtrates' pH value reached 7.0.

##### 1.2 Synthesis of S-FCNFs nanocomposite

32 mg of FCNFs was suspended in 200 ml of H<sub>2</sub>O and stirred for 2 h to form a stable FCNFs dispersion. Then, 20mL solution containing of 1.0 g Na<sub>2</sub>S<sub>2</sub>O<sub>3</sub>·5H<sub>2</sub>O were mixed into the FCNFs. After 2 hours' stir and dispersion, 0.2M HCl was slowly added at the rate of 1ml min<sup>-1</sup> until the solution's pH value reached 2.0. The formed S-FCNFs precipitate was filtered and washed with nano pure water several times in order to eliminate salts and impurities. Finally, S-FCNFs film was obtained by filtration.

##### 1.3 Materials characterization

Transmission electron microscopy (TEM) images were obtained by using a FEI Tecnai G<sup>2</sup> F30 operating at 200 kV. Samples for TEM analysis were prepared by placing a drop of the water dispersion of the sample on a lacey Formvar/carbon copper grid (200 mesh, Ted-Pella). The weight percentage of sulfur in the composite was determined by thermogravimetric analysis (TGA) using a DSC 141 Simultaneous DSC-TGA instrument (TA Instruments)

##### 2.4 Preparation of Cathode and Electrochemical Evaluation:

The sulfur cathode was prepared by directly pressing a small piece of the freestanding S-FCNFs nanocomposite onto a piece of nickel mesh. The total material loading densities were  $8.0 \text{ mg cm}^{-2}$ . 2032 type coin cells were assembled in an argon-filled glove box with lithium foil as the anode. The separator was purchased from Cellgard (model 2400). The electrolyte was 0.1 M lithium nitrate and 1.0 M lithium bis-trifluoromethane sulfonylimide in 1,3-dioxolane and 1,2-dimethoxyethane (volume ratio 1:1). Galvanostatic measurements were conducted using a LAND CT2001A battery test system between 1.5 V and 3.0 V (vs  $\text{Li}^+/\text{Li}$ ).
